# Supplementary material for: Discrimination and quantitation of halobenzoic acid positional isomers upon Th(iv) coordination by mass spectrometry
Source: Royal Society of Chemistry journal article supplement (doi:10.1039/d1cc06925j), 2022-01-01
Supplement: d1cc06925j1.pdf [file d1cc06925j1.pdf]

**Discrimination and quantitation of halobenzoic acid isomers upon Th(IV)  
coordination by mass spectrometry**

Xiuting Chen,<sup>a</sup> Zhixin Xiong,<sup>a,b</sup> Meixian Yang,<sup>a,b</sup> and Yu Gong<sup>a\*</sup>

<sup>a</sup> Department of Radiochemistry, Shanghai Institute of Applied Physics, Chinese Academy of Sciences, Shanghai  
201800, China

<sup>b</sup> School of Nuclear Science and Technology, University of Chinese Academy of Sciences, Beijing 100049, China

\*Email: [gongyu@sinap.ac.cn](mailto:gongyu@sinap.ac.cn)

## 1) Experimental and Computational Section

**Reagents.** *o*-, *m*- and *p*-halobenzoic acids ( $C_6H_4XCO_2H$ , X = F, Cl and Br) were purchased from Macklin. All chemicals were used without further purification. The  $ThCl_4$  stock solution was prepared by dissolving  $ThCl_4$  (99.99%) powder in boiling hydrochloric acid, which was then diluted by Milli-Q ultrapure water at ambient temperature. The thorium isotope employed was  $^{232}Th$ .

**Mass Spectrometry.** All the experiments were performed on a Bruker Daltonics (Bremen, Germany) Solarix XR 7.0T Fourier transform ion cyclotron resonance mass spectrometer (FTICR MS) equipped with a heated electrospray ionization source. The acetonitrile solutions of 0.05 mM  $ThCl_4$  and 0.15 mM *o*-, *m*- or *p*- $C_6H_4XCO_2H$  (X = F, Cl and Br) mixture were prepared for negative ion mode ESI experiments to generate suitable thorium chloride halobenzoate anions with the general formula of  $ThCl_{5-x}(C_6H_4XCO_2)_x^-$ . These anions were readily identified via the isotopic patterns mainly arising from 75.77%  $^{35}Cl$  and 24.23%  $^{37}Cl$  as well as 50.69%  $^{79}Br$  and 49.31%  $^{81}Br$  in some cases. The first isotope of  $ThCl_4(C_6H_4XCO_2)^-$  was selected for precursor to subject CID experiment. High purity nitrogen gas for nebulization and drying in the ESI source was supplied from the boil-off of a liquid nitrogen Dewar. The pressure inside the ICR cell is about  $5.00 \times 10^{-10} \sim 5.00 \times 10^{-9}$  mbar. Detailed instrumental parameters: syringe pump flow rate 4.00  $\mu L/min$ , capillary 4.0 kV, end plate offset -0.5 kV, nebulizer 2 bar, dry gas 1 bar, dry temperature 200  $^{\circ}C$ , capillary exit 220.0 V, deflector plate 2 V, funnel 1 150.0 V, skimmer 1 15 V, funnel RF amplitude 150.0 Vpp, collision voltage 2.5 V, DC extract bias -0.5 V, the time of flight 0.6ms. MS/MS analyses were acquired via sustained off-resonance irradiation collision-induced dissociation (SORI-CID) with the following parameters: isolation power 15%, SORI power 0.4~1.0%, pulse length 0.2s, frequency offset -500 Hz. Mass spectra were collected with an acquisition size of 1 M (mass resolving power more than 100000 at  $m/z$  500) in the range between 21.5 and 1000 Da. Ions were accumulated in the ICR cell for 0.3s and 30 scans were averaged for each spectrum.

**Quantitative analysis.** The acetonitrile solutions of 0.05 mM  $ThCl_4$  and 0.15 mM FBA were prepared for negative ion mode ESI, in which FBA represents binary *o*-FBA/*m*-FBA, *o*-FBA/*p*-FBA or *m*-FBA/*p*-FBA mixtures with the mole ratios of 4:1, 3:2, 2:3 and 1:4. The MS/MS analyses of  $ThCl_4(C_6H_4FCO_2)^-$  were carried out as described above with the SORI power fixed at 0.8%. Each sample was analyzed ten times in order to ensure good repeatability, and the percentage of  $ThFCl_4^-$  in the fragmentation products can be calculated using the equation below. A linear relationship between the proportion of  $ThFCl_4^-$  in the CID spectrum and the fraction of a certain isomer in the solution can be established.

$$ThFCl_4^- \% = \frac{\text{Intensity of } ThFCl_4^-}{\text{Intensity of } ThFCl_4^- + \text{Intensity of } ThCl_4(C_6H_4F)^-}$$

In the case of ternary mixtures, the acetonitrile solutions of 0.05 mM  $ThCl_4$  and 0.15 mM ternary *o*-FBA/*m*-FBA/*p*-FBA with different mole ratios were prepared for the ESI/CID experiments. The MS/MS analyses of  $ThCl_4(C_6H_4FCO_2)^-$  were carried out at a SORI power of 1.0%, under which condition three CID products, namely  $ThFCl_4^-$ ,  $ThCl_3(C_6H_3F)^-$  and  $ThCl_4(C_6H_4F)^-$ , were obtained. A linear relationship between the proportion of  $ThCl_3(C_6H_3F)^-$  among the fragmentation products and the fraction of *p*-FBA in the solution was therefore established (Fig. S5a), and  $ThCl_3(C_6H_3F)^-$  is mainly

generated from  $\text{ThCl}_4(p\text{-C}_6\text{H}_4\text{FCO}_2)^-$ . A linear relationship between the proportion of  $\text{ThFCl}_4^-$  and the fraction of *o*-FBA (Fig. S5b) can be established similarly.

**Computational methods** Density functional theory (DFT) calculations on the species with singlet ground states discussed in this work were performed with the Gaussian 09 package using the hybrid B3LYP density functional.<sup>1-3</sup> The 60 electron core pseudopotential basis sets were used for Th,<sup>4</sup> and the 6-311++G(d,p) basis set was used for all the remaining atoms (C, H, O, F, Cl).<sup>5-9</sup> All the geometrical parameters were fully optimized, and zero-point energy (ZPE) corrections were included in the relative energies. Vibrational frequencies were calculated for all optimized structures to check that they correspond to the local minima (no imaginary frequency) or transition states (one imaginary frequency). Intrinsic reaction coordinate (IRC) calculations were used to confirm the connectivity between transition structures and minima.<sup>10,11</sup>

## Reference

- 1 Gaussian 09, Revision A.01. M. J. Frisch, G. W. Trucks, H. B. Schlegel, G. E. Scuseria, M. A. Robb, J. R. Cheeseman, G. Scalmani, V. Barone, B. Mennucci, G. A. Petersson, H. Nakatsuji, M. Caricato, X. Li, H. P. Hratchian, A. F. Izmaylov, J. Bloino, G. Zheng, J. L. Sonnenberg, M. Hada, M. Ehara, K. Toyota, R. Fukuda, J. Hasegawa, M. Ishida, T. Nakajima, Y. Honda, O. Kitao, H. Nakai, T. Vreven, J. A. Jr. Montgomery, J. E. Peralta, F. Ogliaro, M. Bearpark, J. J. Heyd, E. Brothers, K. N. Kudin, V. N. Staroverov, R. Kobayashi, J. Normand, K. Raghavachari, A. Rendell, J. C. Burant, S. S. Iyengar, J. Tomasi, M. Cossi, N. Rega, J. M. Millam, Klene, M. J. E. Knox, J. B. Cross, V. Bakken, C. Adamo, J. Jaramillo, R. Gomperts, R. E. Stratmann, O. Yazyev, A. J. Austin, R. Cammi, C. Pomelli, J. W. Ochterski, R. L. Martin, K. Morokuma, V. G. Zakrzewski, G. A. Voth, P. Salvador, J. J. Dannenberg, S. Dapprich, A. D. Daniels, O. Farkas, J. B. Foresman, J. V. Ortiz, J. Cioslowski, D. J. Fox, Gaussian, Inc., Wallingford, CT, **2009**.
- 2 C. Lee, W. Yang, R. G. Parr, *Phys. Rev. B* **1988**, *37*, 785-789.
- 3 A. D. Becke, *J. Chem. Phys.* **1993**, *98*, 5648-5652.
- 4 T. Clark, J. Chandrasekhar, G. W. Spitznagel, P. v. R. Schleyer, *J. Comput. Chem.* **1983**, *4*, 294-301.
- 5 R. Krishnan, J. S. Binkley, R. Seeger, J. A. Pople, *J. Chem. Phys.* **1980**, *72*, 650-654.
- 6 A. D. McLean, G. S. Chandler, *J. Chem. Phys.* **1980**, *72*, 5639-5648.
- 7 M. M. Francl, W. J. Pietro, W. J. Hehre, J. S. Binkley, M. S. Gordon, D. J. DeFrees, J. A. Pople, *J. Chem. Phys.* **1982**, *77*, 3654-3665.
- 8 T. Clark, J. Chandrasekhar, G. W. Spitznagel, P. v. R. Schleyer, *J. Comput. Chem.* **1983**, *4*, 294-301.
- 9 G. W. Spitznagel, T. Clark, P. v. R. Schleyer, W. J. Hehre, *J. Comput. Chem.* **1987**, *8*, 1109-1116.
- 10 K. Fukui, *J. Phys. Chem.* **1970**, *74*, 4161-4163.
- 11 K. Fukui, *Acc. Chem. Res.* **1981**, *14*, 363-368.

## 2) Additional Tables and Figures

**Table S1.** Experimental and calculated mass-to-charge ratios (m/z) of relevant species.

| Species                                                                           | Experimental m/z <sup>a</sup> | Calculated m/z <sup>a</sup> | Error in ppm |
|-----------------------------------------------------------------------------------|-------------------------------|-----------------------------|--------------|
| C <sub>6</sub> H <sub>4</sub> FCO <sub>2</sub> <sup>-</sup>                       | 139.02001                     | 139.02008                   | 0.50         |
| C <sub>6</sub> H <sub>4</sub> F <sup>-</sup>                                      | 95.03028                      | 95.03025                    | -0.32        |
| ThCl <sub>4</sub> (C <sub>6</sub> H <sub>4</sub> FCO <sub>2</sub> ) <sup>-</sup>  | 510.93403                     | 510.93355                   | -0.95        |
| ThCl <sub>4</sub> (C <sub>6</sub> H <sub>4</sub> F) <sup>-</sup>                  | 466.94267                     | 466.94372                   | 0.42         |
| ThCl <sub>3</sub> (C <sub>6</sub> H <sub>3</sub> F) <sup>-</sup>                  | 430.96626                     | 466.96704                   | 0.45         |
| ThFCl <sub>4</sub> <sup>-</sup>                                                   | 390.91274                     | 390.91242                   | -0.81        |
| C <sub>6</sub> H <sub>4</sub> ClCO <sub>2</sub> <sup>-</sup>                      | 154.99061                     | 154.99053                   | -0.20        |
| C <sub>6</sub> H <sub>4</sub> Cl <sup>-</sup>                                     | 111.00100                     | 111.00070                   | -0.52        |
| Cl <sup>-</sup>                                                                   | 34.96936                      | 34.96940                    | 1.14         |
| ThCl <sub>4</sub> (C <sub>6</sub> H <sub>4</sub> ClCO <sub>2</sub> ) <sup>-</sup> | 526.90472                     | 526.90400                   | -1.24        |
| ThCl <sub>4</sub> (C <sub>6</sub> H <sub>4</sub> Cl) <sup>-</sup>                 | 482.91379                     | 482.91307                   | -1.56        |
| ThCl <sub>3</sub> (C <sub>6</sub> H <sub>3</sub> Cl) <sup>-</sup>                 | 446.93805                     | 446.93749                   | -1.39        |
| ThCl <sub>5</sub> <sup>-</sup>                                                    | 406.88234                     | 406.88177                   | -1.27        |
| C <sub>6</sub> H <sub>4</sub> BrCO <sub>2</sub> <sup>-</sup>                      | 198.94035                     | 198.94002                   | -1.66        |
| C <sub>6</sub> H <sub>4</sub> Br <sup>-</sup>                                     | 154.95037                     | 154.95019                   | -1.16        |
| Br <sup>-</sup>                                                                   | 78.91901                      | 78.91889                    | -1.52        |
| ThCl <sub>4</sub> (C <sub>6</sub> H <sub>4</sub> BrCO <sub>2</sub> ) <sup>-</sup> | 570.85420                     | 570.85348                   | -1.26        |
| ThCl <sub>4</sub> (C <sub>6</sub> H <sub>4</sub> Br) <sup>-</sup>                 | 526.86332                     | 526.86256                   | -1.43        |
| ThCl <sub>3</sub> (C <sub>6</sub> H <sub>3</sub> Br) <sup>-</sup>                 | 490.88744                     | 490.88698                   | -0.95        |
| ThBrCl <sub>4</sub> <sup>-</sup>                                                  | 450.83202                     | 450.83126                   | -1.67        |

<sup>a</sup> For the most abundant isotopomer.

**Table S2.** Actual and measured compositions of binary FBA isomer mixtures (relative error in italic).<sup>a</sup>

| Actual compositions                     | Measured compositions                     |               |               |               |               |
|-----------------------------------------|-------------------------------------------|---------------|---------------|---------------|---------------|
|                                         | <i>relative error <math>\delta</math></i> |               |               |               |               |
| 50%/50%<br><i>o</i> -FBA/ <i>p</i> -FBA | 51.22%/48.78%                             | 48.89%/51.11% | 51.38%/48.62% | 49.18%/50.82% | 49.35%/50.65% |
|                                         | <i>2.07%</i>                              |               |               |               |               |
| 50%/50%<br><i>m</i> -FBA/ <i>o</i> -FBA | 51.42%/48.58%                             | 50.89%/49.11% | 49.39%/50.61% | 49.55%/50.45% | 52.15%/47.85% |
|                                         | <i>2.21%</i>                              |               |               |               |               |
| 50%/50%<br><i>p</i> -FBA/ <i>m</i> -FBA | 51.37%/48.63%                             | 50.53%/49.47% | 48.66%/51.34% | 52.34%/47.66% | 51.30%/48.70% |
|                                         | <i>2.75%</i>                              |               |               |               |               |

<sup>a</sup> Each sample was analyzed five times. The relative error  $\delta$  = average value of  $|\text{measured fraction of a certain isomer} - \text{actual fraction of a certain isomer}| / \text{actual fraction of a certain isomer} \times 100\%$ .

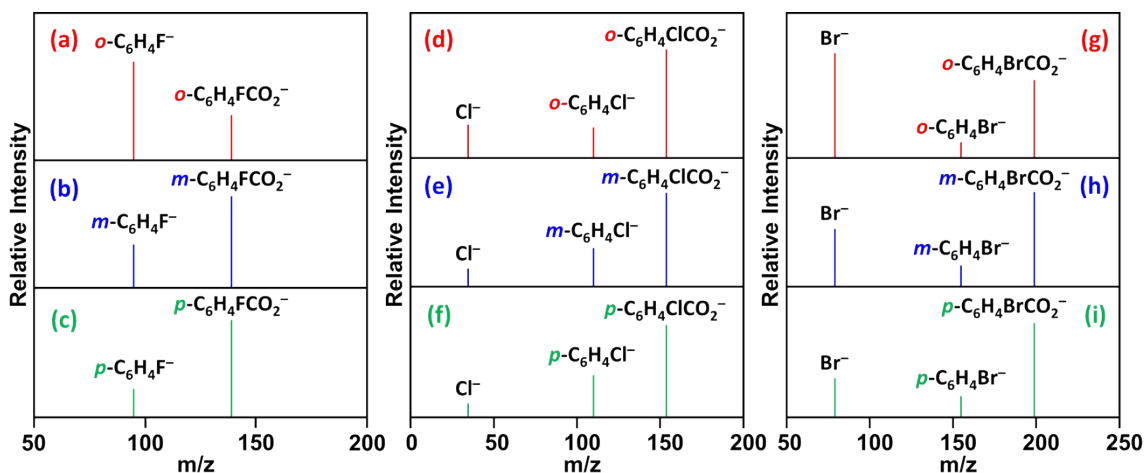

**Fig. S1** CID mass spectra of (a) *o*-, (b) *m*- and (c) *p*- $C_6H_4FCO_2^-$ , (d) *o*-, (e) *m*- and (f) *p*- $C_6H_4ClCO_2^-$ , (g) *o*-, (h) *m*- and (i) *p*- $C_6H_4BrCO_2^-$ . A single isotopomer was mass selected (SORI power 0.4%).

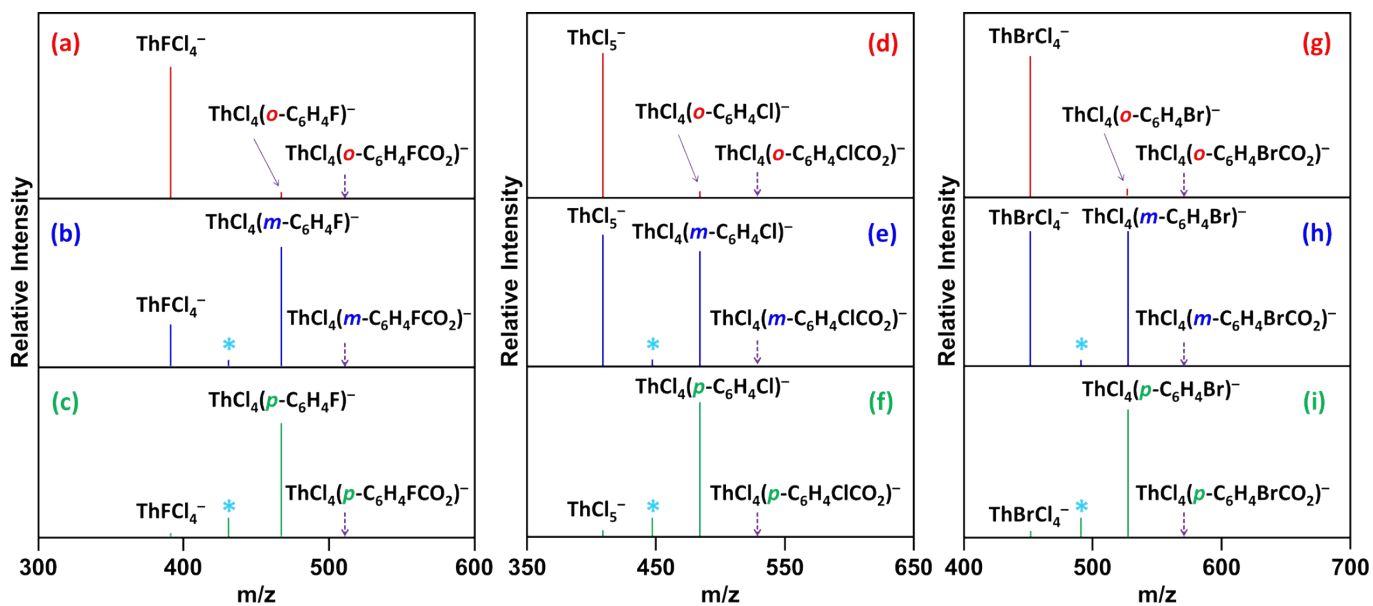

**Fig. S2** CID mass spectra of (a) *ortho*, (b) *meta* and (c) *para* isomers of  $ThCl_4(C_6H_4FCO_2)^-$ , (d) *ortho*, (e) *meta* and (f) *para* isomers of  $ThCl_4(C_6H_4ClCO_2)^-$ , (g) *ortho*, (h) *meta* and (i) *para* isomers of  $ThCl_4(C_6H_4BrCO_2)^-$ . The asterisks denote  $ThCl_3(C_6H_3X)^-$  ( $X = F, Cl$  and  $Br$ ), and the dotted arrows indicate the  $ThCl_4(C_6H_4XCO_2)^-$  parent ions which completely dissociate. A single isotopomer was mass selected (SORI power 1.0%).

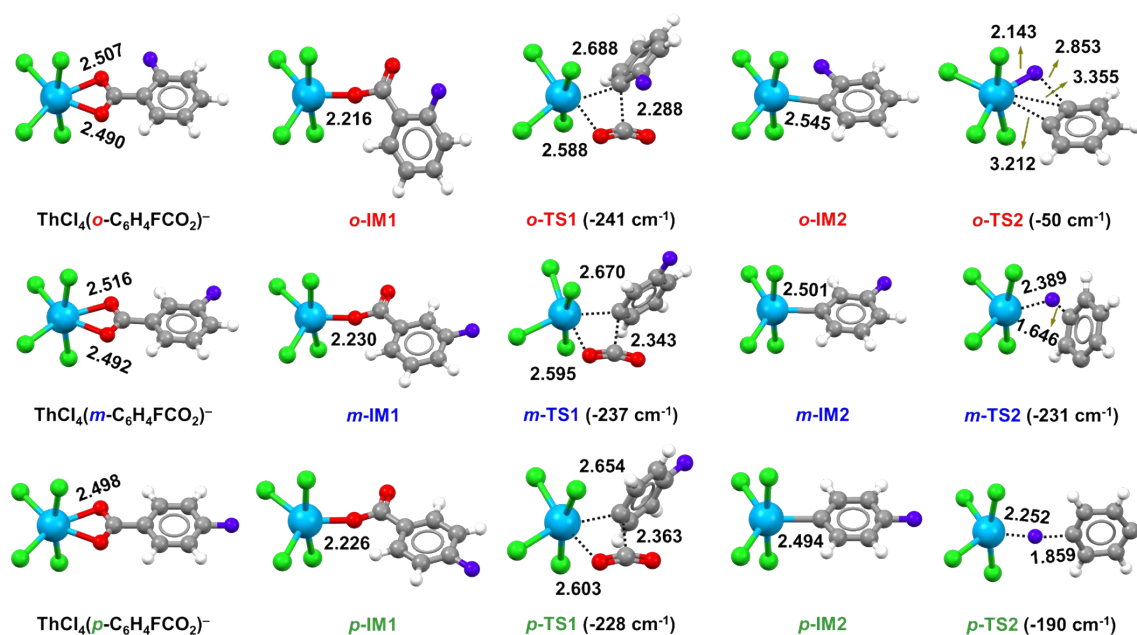

**Fig. S3** The structures and selected bond lengths (Å) of ions involved in the decarboxylation and fluoride transfer pathways of  $\text{ThCl}_4(\text{C}_6\text{H}_4\text{FCO}_2)^-$  at the B3LYP/6-311++G(d,p)/SDD level of theory. Th cyan, C gray, H white, O red, Cl green, F blue.

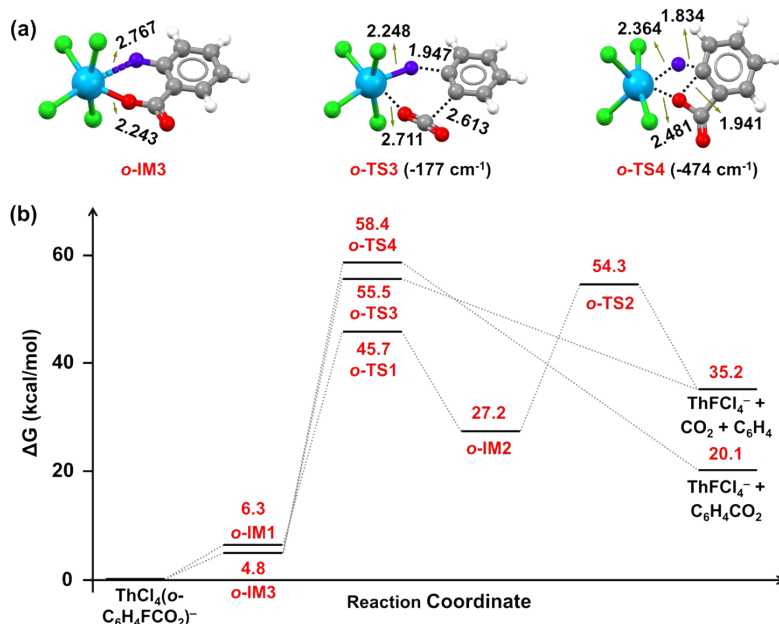

**Fig. S4** (a) The structures and selected bond lengths (Å) of ions involved in the concerted  $\text{CO}_2/\text{C}_6\text{H}_4$  elimination and lactone loss pathways of  $\text{ThCl}_4(o\text{-C}_6\text{H}_4\text{FCO}_2)^-$  at the B3LYP/6-311++G(d,p)/SDD level of theory. Th cyan, C gray, H white, O red, Cl green, F blue. (b) The Gibbs free energies (kcal/mol) for the sequential and concerted  $\text{CO}_2/\text{C}_6\text{H}_4$  elimination as well as the  $\text{C}_6\text{H}_4\text{CO}_2$  lactone loss pathways of  $\text{ThCl}_4(o\text{-C}_6\text{H}_4\text{FCO}_2)^-$ .

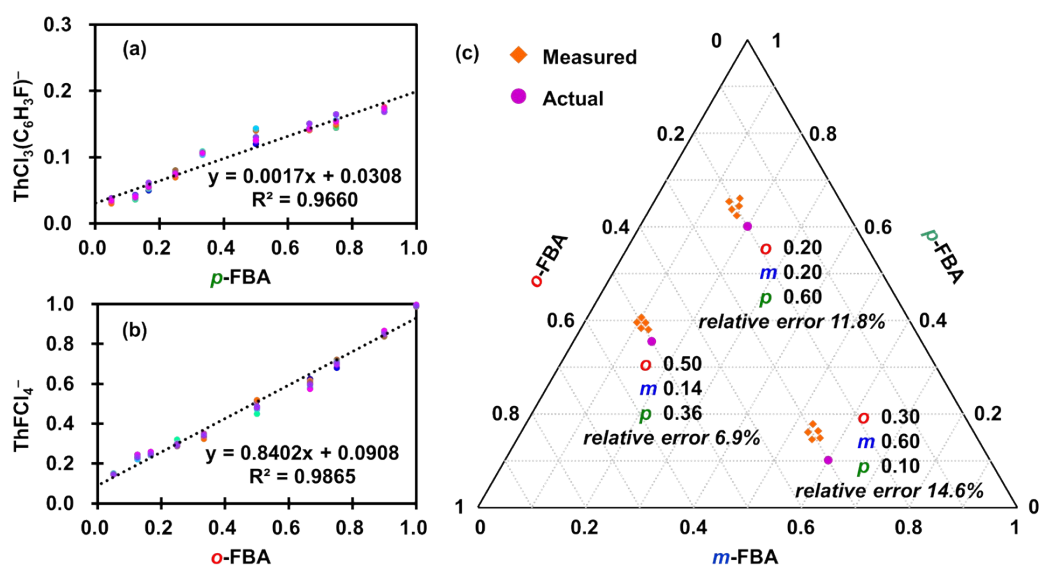

**Fig. S5** Linear relationships between (a) the proportion of  $\text{ThCl}_3(\text{C}_6\text{H}_3\text{F})^-$  and the fraction of *p*-FBA, (b) the proportion of  $\text{ThFCl}_4^-$  and the fraction of *o*-FBA in the acetonitrile solution of ternary FBA mixtures. (c) Actual (magenta solid circle) and measured (orange diamond) compositions of three ternary FBA isomer mixtures, each of which was analyzed five times.

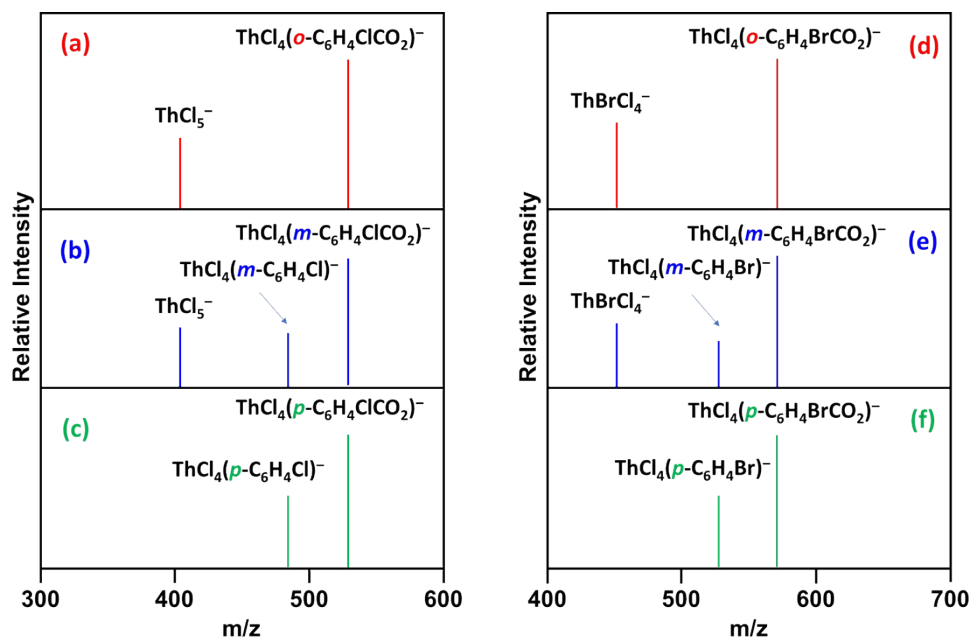

**Fig. S6** CID mass spectra of (a) *ortho*, (b) *meta*, (c) *para* isomers of  $\text{ThCl}_4(\text{C}_6\text{H}_4\text{ClCO}_2)^-$ , and (d) *ortho*, (e) *meta*, (f) *para* isomers of  $\text{ThCl}_4(\text{C}_6\text{H}_4\text{BrCO}_2)^-$ . A single isotopomer was mass selected (SORI power 0.8%).



**3) Calculated Cartesian coordinates, energies (Hartree) and frequencies (for transition states) of the relevant species obtained at the B3LYP/SDD/6-311++G(d,p) level of theory.**

**ThCl<sub>4</sub>(*o*-C<sub>6</sub>H<sub>4</sub>FCO<sub>2</sub>)<sup>-</sup>**

|                                                          |             |             |             |
|----------------------------------------------------------|-------------|-------------|-------------|
| Th                                                       | 1.24678400  | -0.01663900 | 0.00172700  |
| Cl                                                       | 0.97563700  | -0.42780200 | -2.63257700 |
| Cl                                                       | 2.74142400  | 2.15816900  | -0.31348500 |
| Cl                                                       | 2.92209500  | -2.06362400 | 0.29430200  |
| Cl                                                       | 0.97976200  | 0.33594300  | 2.64446200  |
| O                                                        | -0.95768300 | -1.16302100 | 0.16808300  |
| O                                                        | -1.03357000 | 1.01547700  | -0.14494600 |
| C                                                        | -1.62614100 | -0.09022900 | 0.01329300  |
| C                                                        | -3.11942000 | -0.18397900 | 0.02133000  |
| C                                                        | -3.70668800 | -1.45097500 | 0.15015700  |
| C                                                        | -3.97952000 | 0.91298000  | -0.09220600 |
| C                                                        | -5.08558200 | -1.61660300 | 0.16271300  |
| H                                                        | -3.03793300 | -2.29747900 | 0.23934900  |
| C                                                        | -5.36172100 | 0.76871200  | -0.07982500 |
| C                                                        | -5.91545300 | -0.50087400 | 0.04733500  |
| H                                                        | -5.51182300 | -2.60801700 | 0.26195000  |
| H                                                        | -5.97828700 | 1.65466800  | -0.16989600 |
| H                                                        | -6.99382300 | -0.61590500 | 0.05633800  |
| F                                                        | -3.50146000 | 2.16274900  | -0.21565900 |
| Sum of electronic and zero-point Energies = -2768.670462 |             |             |             |

**ThCl<sub>4</sub>(*o*-C<sub>6</sub>H<sub>4</sub>FCO<sub>2</sub>)<sup>-</sup> *o*-IM1**

|    |             |             |             |
|----|-------------|-------------|-------------|
| Th | -1.32402900 | -0.02045300 | 0.02452900  |
| Cl | -0.63410000 | -2.26423400 | -1.29720900 |
| Cl | -1.93018900 | -1.41386200 | 2.20118700  |
| Cl | -3.29418900 | 0.44213500  | -1.69404200 |
| Cl | -1.73959900 | 2.29136600  | 1.28160400  |
| O  | 2.08850400  | 2.04295100  | -1.30797200 |
| O  | 0.80098600  | 0.54832800  | -0.24489900 |
| C  | 1.96542800  | 1.04186900  | -0.63874300 |
| C  | 3.14651800  | 0.20619500  | -0.21007900 |
| C  | 3.02590100  | -1.18582600 | -0.10056000 |
| C  | 4.40549700  | 0.75987600  | 0.03432900  |
| C  | 4.12029500  | -1.98474900 | 0.21643300  |
| H  | 2.05845400  | -1.63576700 | -0.28726600 |
| C  | 5.50597700  | -0.01603300 | 0.37092700  |
| C  | 5.36225400  | -1.39852700 | 0.45495900  |
| H  | 3.99985600  | -3.05986700 | 0.27978500  |
| H  | 6.45304500  | 0.47352900  | 0.56301500  |
| H  | 6.21928900  | -2.01197600 | 0.71060900  |

|                                                          |             |             |             |
|----------------------------------------------------------|-------------|-------------|-------------|
| F                                                        | 4.58801800  | 2.09620800  | -0.01895400 |
| Sum of electronic and zero-point Energies = -2768.658950 |             |             |             |
| <b><i>o</i>-TS1 (-241 cm<sup>-1</sup>)</b>               |             |             |             |
| Th                                                       | -0.81850400 | -0.10757700 | 0.03988200  |
| Cl                                                       | -0.97579900 | 0.44542800  | -2.59000000 |
| Cl                                                       | -1.24870900 | -2.68637800 | -0.38287900 |
| Cl                                                       | -3.20676400 | 0.94100900  | 0.50665100  |
| Cl                                                       | -0.33810400 | -0.45428100 | 2.62883200  |
| O                                                        | 2.06111500  | 2.86066900  | -0.90420800 |
| O                                                        | 0.02244300  | 2.33977300  | 0.04414200  |
| C                                                        | 1.12495400  | 2.34496400  | -0.43211700 |
| C                                                        | 1.83667800  | 0.17638800  | -0.26587100 |
| C                                                        | 2.20088100  | -0.65044700 | -1.35027200 |
| C                                                        | 2.77214100  | 0.22418700  | 0.76530000  |
| C                                                        | 3.38332000  | -1.39315200 | -1.36334400 |
| H                                                        | 1.54166700  | -0.71609300 | -2.21082000 |
| C                                                        | 3.95841600  | -0.49318000 | 0.79919000  |
| C                                                        | 4.26137600  | -1.31676400 | -0.28397400 |
| H                                                        | 3.61674000  | -2.02556700 | -2.21331400 |
| H                                                        | 4.62199100  | -0.40049900 | 1.65111100  |
| H                                                        | 5.18228300  | -1.89032600 | -0.28237800 |
| F                                                        | 2.54300600  | 1.06452400  | 1.81875800  |
| Sum of electronic and zero-point Energies = -2768.598932 |             |             |             |

**ThCl<sub>4</sub>(*o*-C<sub>6</sub>H<sub>4</sub>F)<sup>-</sup> *o*-IM2**

|    |             |             |             |
|----|-------------|-------------|-------------|
| Th | 0.69148400  | -0.04239600 | 0.00471400  |
| Cl | 0.46299700  | 0.27495900  | 2.64718100  |
| Cl | 2.06500700  | -2.29883900 | 0.27659100  |
| Cl | 2.05938200  | 2.23091200  | -0.26692000 |
| Cl | 0.47736200  | -0.35807800 | -2.63942900 |
| C  | -1.82571600 | -0.41329100 | 0.03586800  |
| C  | -2.44274200 | 0.81458200  | -0.07444000 |
| C  | -2.71547000 | -1.49771700 | 0.13016300  |
| C  | -3.80168900 | 1.07064700  | -0.09707900 |
| C  | -4.10161000 | -1.31894900 | 0.11304900  |
| H  | -2.32567900 | -2.50884900 | 0.21807300  |
| C  | -4.64549300 | -0.03736800 | 0.00042400  |
| H  | -4.76146100 | -2.17804700 | 0.18705700  |
| H  | -5.72121700 | 0.10275600  | -0.01227900 |
| H  | -4.18221800 | 2.08147700  | -0.18632700 |

|   |             |            |             |
|---|-------------|------------|-------------|
| F | -1.57193100 | 1.90873900 | -0.17498600 |
|---|-------------|------------|-------------|

Sum of electronic and zero-point Energies = -2579.975284

***o*-TS2 (-50 cm<sup>-1</sup>)**

|    |             |             |             |
|----|-------------|-------------|-------------|
| Th | 0.76942200  | 0.00000600  | -0.10064000 |
| Cl | 0.47226400  | -2.67772300 | -0.14085200 |
| Cl | 0.47290200  | 2.67782200  | -0.13984700 |
| Cl | 0.21293600  | -0.00041900 | 2.54226000  |
| Cl | 3.41907700  | -0.00028000 | -0.32326200 |
| C  | -2.39587700 | 0.00017300  | 0.44339400  |
| C  | -3.46806600 | -0.00036700 | 1.32492600  |
| C  | -2.51182700 | 0.00061800  | -0.79611900 |
| C  | -4.69423100 | -0.00033300 | 0.63288800  |
| H  | -3.39543800 | -0.00078000 | 2.40446700  |
| C  | -3.62703000 | 0.00067300  | -1.59788700 |
| C  | -4.77284300 | 0.00017400  | -0.77355300 |
| H  | -5.61709100 | -0.00072900 | 1.20502900  |
| H  | -3.66433200 | 0.00104500  | -2.67831600 |
| H  | -5.75034100 | 0.00017000  | -1.24647200 |
| F  | 0.02071000  | 0.00048400  | -2.10889700 |

Sum of electronic and zero-point Energies = -2579.944857

**ThCl<sub>4</sub>(*o*-C<sub>6</sub>H<sub>4</sub>FCO<sub>2</sub>)<sup>-</sup> *o*-IM3**

|    |             |             |             |
|----|-------------|-------------|-------------|
| Th | 0.04578600  | 1.09328000  | 0.00000000  |
| Cl | -0.10060100 | 0.73015600  | 2.65326800  |
| Cl | 1.60892500  | 3.22852700  | 0.00000000  |
| Cl | -2.45796800 | 2.01567200  | 0.00000000  |
| Cl | -0.10060100 | 0.73015600  | -2.65326800 |
| O  | 2.85416900  | -2.38796700 | 0.00000000  |
| O  | 1.36383800  | -0.72162400 | 0.00000000  |
| C  | 1.70899700  | -1.97952800 | 0.00000000  |
| C  | 0.56046400  | -2.97688700 | 0.00000000  |
| C  | 0.87952600  | -4.34228200 | 0.00000000  |
| C  | -0.79752000 | -2.66630400 | 0.00000000  |
| C  | -0.10060100 | -5.32647900 | 0.00000000  |
| H  | 1.93301700  | -4.59360500 | 0.00000000  |
| C  | -1.80265000 | -3.61980200 | 0.00000000  |
| C  | -1.44825900 | -4.96474200 | 0.00000000  |
| H  | 0.18323100  | -6.37268600 | 0.00000000  |
| H  | -2.83527700 | -3.29455600 | 0.00000000  |
| H  | -2.22310100 | -5.72300100 | 0.00000000  |
| F  | -1.22979800 | -1.36168500 | 0.00000000  |

Sum of electronic and zero-point Energies = -2768.663449

***o*-TS3 (-177 cm<sup>-1</sup>)**

|    |             |             |             |
|----|-------------|-------------|-------------|
| Th | -1.05280100 | -0.14048200 | -0.00001700 |
| Cl | -0.70823500 | 0.15322500  | 2.63782600  |
| Cl | -3.00078100 | 1.67422700  | 0.00068900  |

|    |             |             |             |
|----|-------------|-------------|-------------|
| Cl | -2.45836100 | -2.37867400 | -0.00066600 |
| Cl | -0.70853600 | 0.15494300  | -2.63771500 |
| O  | 2.51190800  | 3.34724600  | 0.00012800  |
| O  | 0.64792800  | 1.97102900  | 0.00049700  |
| C  | 1.66315200  | 2.55675300  | 0.00028600  |
| C  | 3.23863200  | 0.47213200  | 0.00000200  |
| C  | 4.64383700  | 0.62027300  | 0.00014200  |
| C  | 2.88197300  | -0.76065000 | -0.00021200 |
| C  | 5.44828000  | -0.52739300 | 0.00004800  |
| H  | 5.10564900  | 1.60503500  | 0.00032100  |
| C  | 3.48784300  | -1.98192900 | -0.00033200 |
| C  | 4.88452300  | -1.81287900 | -0.00018400 |
| H  | 6.52974300  | -0.42592200 | 0.00015700  |
| H  | 2.99378900  | -2.94282600 | -0.00051200 |
| H  | 5.52217900  | -2.69064200 | -0.00025200 |
| F  | 0.96923400  | -1.12328600 | -0.00043600 |

Sum of electronic and zero-point Energies = -2768.579708

***o*-TS4 (-474 cm<sup>-1</sup>)**

|    |             |             |             |
|----|-------------|-------------|-------------|
| Th | 0.99764900  | -0.04723800 | -0.02345500 |
| Cl | 1.05948500  | 2.19811900  | -1.46088500 |
| Cl | 2.55438200  | 0.89195000  | 1.90954100  |
| Cl | 2.68135200  | -1.33172700 | -1.62452200 |
| Cl | 0.37074100  | -2.28794900 | 1.35284500  |
| O  | -2.12758000 | 2.83509900  | 0.86730700  |
| O  | -1.19748900 | 0.73732500  | 0.82651300  |
| C  | -2.15142500 | 1.67787200  | 0.56511000  |
| C  | -3.16178600 | 0.79448500  | -0.06907300 |
| C  | -4.54745800 | 0.75608600  | -0.17970900 |
| C  | -2.45695200 | -0.38919400 | -0.12802800 |
| C  | -5.15395800 | -0.49666100 | -0.30406400 |
| H  | -5.13011000 | 1.66576700  | -0.08468900 |
| C  | -2.98612900 | -1.65060900 | -0.11766700 |
| C  | -4.38671100 | -1.66583700 | -0.23731400 |
| H  | -6.23075700 | -0.57192300 | -0.39921300 |
| H  | -2.38192100 | -2.54502700 | -0.07969700 |
| H  | -4.87865100 | -2.63065600 | -0.30418200 |
| F  | -0.98014200 | -0.59996600 | -1.19511500 |

Sum of electronic and zero-point Energies = -2768.570340

**ThFCl<sub>4</sub><sup>-</sup>**

|    |             |             |             |
|----|-------------|-------------|-------------|
| Th | 0.00000000  | 0.00000000  | 0.13406100  |
| Cl | 0.00000000  | 2.68484300  | 0.24925900  |
| Cl | 0.00000000  | -2.68484300 | 0.24925900  |
| Cl | -2.31123700 | 0.00000000  | -1.20156000 |
| Cl | 2.31123700  | 0.00000000  | -1.20156000 |
| F  | 0.00000000  | 0.00000000  | 2.25697400  |

Sum of electronic and zero-point Energies = -2349.045984

|                                                         |            |            |             |
|---------------------------------------------------------|------------|------------|-------------|
| <b>CO<sub>2</sub></b>                                   |            |            |             |
| C                                                       | 0.00000000 | 0.00000000 | 0.00000000  |
| O                                                       | 0.00000000 | 0.00000000 | 1.16080000  |
| O                                                       | 0.00000000 | 0.00000000 | -1.16080000 |
| Sum of electronic and zero-point Energies = -188.635227 |            |            |             |

|                                                         |             |             |             |
|---------------------------------------------------------|-------------|-------------|-------------|
| <b><i>o</i>-C<sub>6</sub>H<sub>4</sub></b>              |             |             |             |
| C                                                       | -0.70293900 | 1.05683800  | 0.00029000  |
| C                                                       | -1.45873300 | -0.13466600 | -0.00014200 |
| C                                                       | -0.62167900 | -1.23473100 | 0.00014500  |
| C                                                       | 0.62296000  | -1.23467300 | -0.00002400 |
| C                                                       | 1.45869700  | -0.13348700 | -0.00050800 |
| C                                                       | 0.70198200  | 1.05735900  | 0.00008900  |
| H                                                       | -1.22953500 | 2.00586700  | 0.00076600  |
| H                                                       | -2.54094000 | -0.13724500 | 0.00021000  |
| H                                                       | 2.54092100  | -0.13524300 | -0.00048300 |
| H                                                       | 1.22782600  | 2.00679200  | 0.00041200  |
| Sum of electronic and zero-point Energies = -230.897891 |             |             |             |

|                                                         |             |             |            |
|---------------------------------------------------------|-------------|-------------|------------|
| <b>C<sub>6</sub>H<sub>4</sub>CO<sub>2</sub> lactone</b> |             |             |            |
| O                                                       | -2.23839600 | 1.82480400  | 0.00000000 |
| O                                                       | -1.77184600 | -0.49106000 | 0.00000000 |
| C                                                       | -1.46359200 | 0.93908100  | 0.00000000 |
| C                                                       | 0.00000000  | 0.61855000  | 0.00000000 |
| C                                                       | 1.31945700  | 1.01638500  | 0.00000000 |
| C                                                       | -0.38358300 | -0.71365500 | 0.00000000 |
| C                                                       | 2.25206100  | -0.03835300 | 0.00000000 |
| H                                                       | 1.63246900  | 2.05281500  | 0.00000000 |
| C                                                       | 0.48832700  | -1.77128500 | 0.00000000 |
| C                                                       | 1.84461100  | -1.37604000 | 0.00000000 |
| H                                                       | 3.31129000  | 0.18775200  | 0.00000000 |
| H                                                       | 0.18860400  | -2.81038100 | 0.00000000 |
| H                                                       | 2.60588800  | -2.14823200 | 0.00000000 |
| Sum of electronic and zero-point Energies = -419.574551 |             |             |            |

|                                                                                         |             |             |             |
|-----------------------------------------------------------------------------------------|-------------|-------------|-------------|
| <b>ThCl<sub>4</sub>(<i>m</i>-C<sub>6</sub>H<sub>4</sub>FCO<sub>2</sub>)<sup>-</sup></b> |             |             |             |
| Th                                                                                      | 1.33394400  | 0.01757500  | -0.00106800 |
| Cl                                                                                      | 1.05878500  | -0.36385700 | -2.63794500 |
| Cl                                                                                      | 2.66017400  | 2.29989400  | -0.28960300 |
| Cl                                                                                      | 3.15346700  | -1.90769400 | 0.23626100  |
| Cl                                                                                      | 1.06106500  | 0.30503200  | 2.64785400  |
| O                                                                                       | -0.81646600 | -1.23099400 | 0.15510500  |
| O                                                                                       | -1.00007800 | 0.95012900  | -0.11654600 |
| C                                                                                       | -1.53470900 | -0.19086300 | 0.02356600  |
| C                                                                                       | -3.02357000 | -0.32021400 | 0.03442300  |
| C                                                                                       | -3.61565700 | -1.57995800 | 0.15870800  |
| C                                                                                       | -3.81553000 | 0.82577200  | -0.08091400 |

|                                                          |             |             |             |
|----------------------------------------------------------|-------------|-------------|-------------|
| C                                                        | -5.00259700 | -1.69624900 | 0.16679500  |
| H                                                        | -2.97556400 | -2.44807500 | 0.24647400  |
| C                                                        | -5.18971200 | 0.67502100  | -0.06730100 |
| H                                                        | -3.35561300 | 1.80053500  | -0.17733400 |
| C                                                        | -5.80646900 | -0.56169100 | 0.05354100  |
| H                                                        | -5.46571900 | -2.67187300 | 0.26147600  |
| H                                                        | -6.88789700 | -0.62407700 | 0.05763900  |
| F                                                        | -5.97530600 | 1.78115300  | -0.17724000 |
| Sum of electronic and zero-point Energies = -2768.678952 |             |             |             |

|                                                                                                      |             |             |             |
|------------------------------------------------------------------------------------------------------|-------------|-------------|-------------|
| <b>ThCl<sub>4</sub>(<i>m</i>-C<sub>6</sub>H<sub>4</sub>FCO<sub>2</sub>)<sup>-</sup> <i>m</i>-IM1</b> |             |             |             |
| Th                                                                                                   | -1.43387200 | 0.01301500  | -0.00204400 |
| Cl                                                                                                   | -1.27875600 | 0.23334100  | 2.65720500  |
| Cl                                                                                                   | -1.90336900 | 2.59707000  | -0.35820000 |
| Cl                                                                                                   | -3.60582500 | -1.50595600 | 0.20137900  |
| Cl                                                                                                   | -1.26729500 | -0.49270500 | -2.62022000 |
| O                                                                                                    | 1.91507600  | -2.30791500 | 0.25645700  |
| O                                                                                                    | 0.75569700  | -0.40320600 | 0.06053600  |
| C                                                                                                    | 1.87159700  | -1.09911100 | 0.13039800  |
| C                                                                                                    | 3.13336200  | -0.27459700 | 0.04215600  |
| C                                                                                                    | 3.10320300  | 1.11709200  | -0.08289800 |
| C                                                                                                    | 4.36155600  | -0.94271000 | 0.09030200  |
| C                                                                                                    | 4.29287500  | 1.83838200  | -0.15833200 |
| H                                                                                                    | 2.14908300  | 1.62466100  | -0.11965800 |
| C                                                                                                    | 5.52314700  | -0.19916400 | 0.01173100  |
| C                                                                                                    | 5.52223600  | 1.18260800  | -0.11173600 |
| H                                                                                                    | 4.26554300  | 2.91787800  | -0.25402300 |
| H                                                                                                    | 6.46130100  | 1.71947200  | -0.16902700 |
| H                                                                                                    | 4.38705300  | -2.02034200 | 0.18688400  |
| F                                                                                                    | 6.72340700  | -0.84431600 | 0.05681300  |
| Sum of electronic and zero-point Energies = -2768.667246                                             |             |             |             |

|                                            |             |             |             |
|--------------------------------------------|-------------|-------------|-------------|
| <b><i>m</i>-TS1 (-237 cm<sup>-1</sup>)</b> |             |             |             |
| Th                                         | -0.89709100 | -0.11251000 | -0.09772600 |
| Cl                                         | -1.15421900 | 2.28602000  | -1.27064500 |
| Cl                                         | -0.92043300 | -1.54300500 | -2.32346900 |
| Cl                                         | -3.42932300 | -0.01816700 | 0.70256200  |
| Cl                                         | -0.40022600 | -2.13242900 | 1.59067000  |
| O                                          | 1.85496300  | 1.98736400  | 2.42833800  |
| O                                          | -0.31363200 | 1.33442100  | 1.97553600  |
| C                                          | 0.86542600  | 1.54256400  | 1.99757900  |
| C                                          | 1.70697100  | 0.44212500  | 0.10841900  |
| C                                          | 2.22151400  | 1.36220700  | -0.83088500 |
| C                                          | 2.56027200  | -0.61597100 | 0.49140100  |
| C                                          | 3.50030300  | 1.23041100  | -1.37304800 |
| H                                          | 1.60930200  | 2.19694700  | -1.15307800 |
| C                                          | 3.82711900  | -0.72414800 | -0.05630800 |
| C                                          | 4.32466800  | 0.17524200  | -0.98539700 |

|   |            |             |             |
|---|------------|-------------|-------------|
| H | 3.86069400 | 1.95189700  | -2.09983100 |
| H | 5.32299100 | 0.04467500  | -1.38597100 |
| H | 2.24491800 | -1.36355100 | 1.21054100  |
| F | 4.63371500 | -1.75822500 | 0.33300800  |

Sum of electronic and zero-point Energies = -2768.598858

**ThCl<sub>4</sub>(*m*-C<sub>6</sub>H<sub>4</sub>F)<sup>-</sup> *m*-IM2**

|    |             |             |             |
|----|-------------|-------------|-------------|
| Th | -0.83367500 | 0.03180000  | 0.00172700  |
| Cl | -0.67332900 | 0.45863300  | -2.63088600 |
| Cl | -2.17175400 | -2.24711800 | -0.36652400 |
| Cl | -1.84425300 | 2.46986700  | 0.37781400  |
| Cl | -0.71815000 | -0.37474400 | 2.64038500  |
| C  | 1.65458300  | -0.22274300 | -0.01628000 |
| C  | 2.59939600  | 0.81530800  | 0.07769200  |
| C  | 2.15995300  | -1.53146300 | -0.13452900 |
| C  | 3.95450300  | 0.52950300  | 0.05288100  |
| H  | 2.30106800  | 1.85658600  | 0.17004900  |
| C  | 3.52896000  | -1.80259000 | -0.15890800 |
| H  | 1.47587400  | -2.37602300 | -0.20936300 |
| C  | 4.44999400  | -0.75961600 | -0.06370200 |
| H  | 3.88515000  | -2.82425100 | -0.25102500 |
| H  | 5.51981000  | -0.93038100 | -0.07854500 |
| F  | 4.85464600  | 1.55875500  | 0.14634800  |

Sum of electronic and zero-point Energies = -2579.970097

***m*-TS2 (-231 cm<sup>-1</sup>)**

|    |             |             |             |
|----|-------------|-------------|-------------|
| Th | -0.68577000 | -0.02267400 | 0.00264500  |
| Cl | -2.93295000 | -0.84367200 | -1.05495700 |
| Cl | 0.14616100  | -2.50390800 | 0.40748300  |
| Cl | -1.13367400 | 2.48361900  | -0.73833100 |
| Cl | -1.18577000 | 0.42713400  | 2.53212700  |
| C  | 3.64972500  | 1.41499700  | 0.74469600  |
| C  | 2.47988600  | 1.34345900  | -0.06356000 |
| C  | 4.55477700  | 0.34090500  | 0.65291300  |
| C  | 2.38922500  | 0.21398900  | -0.82852800 |
| H  | 1.75751600  | 2.15561000  | -0.12289000 |
| C  | 4.39046900  | -0.76929200 | -0.18228800 |
| H  | 5.45560300  | 0.37017500  | 1.26699600  |
| C  | 3.23227700  | -0.85697000 | -0.96318400 |
| H  | 5.12856800  | -1.56989300 | -0.22816400 |
| H  | 2.99558800  | -1.69761500 | -1.59861700 |
| F  | 1.00108800  | 0.00954200  | -1.68923900 |

Sum of electronic and zero-point Energies = -2579.891315

***m*-C<sub>6</sub>H<sub>4</sub>**

|   |             |            |             |
|---|-------------|------------|-------------|
| C | -1.45738700 | 0.00007300 | 0.00001800  |
| C | -0.66368400 | 1.16627300 | 0.00000400  |
| C | 0.66754300  | 0.80480000 | -0.00001400 |

|   |             |             |             |
|---|-------------|-------------|-------------|
| C | 1.74807000  | 0.00019100  | -0.00002600 |
| C | 0.66760100  | -0.80514400 | -0.00000400 |
| C | -0.66358500 | -1.16621100 | 0.00001700  |
| H | -2.54438700 | -0.00014600 | 0.00003300  |
| H | -1.03916500 | 2.18013500  | 0.00000500  |
| H | -1.03975300 | -2.17984200 | 0.00003100  |
| H | 2.83195700  | -0.00004100 | -0.00004000 |

Sum of electronic and zero-point Energies = -230.878276

**ThCl<sub>4</sub>(*p*-C<sub>6</sub>H<sub>4</sub>FCO<sub>2</sub>)<sup>-</sup>**

|    |             |             |             |
|----|-------------|-------------|-------------|
| Th | 1.37566800  | -0.00000600 | -0.00003900 |
| Cl | 1.10552500  | 2.66642100  | -0.00233500 |
| Cl | 2.95524600  | 0.00158100  | 2.13923800  |
| Cl | 2.95656300  | -0.00191900 | -2.13839400 |
| Cl | 1.10507500  | -2.66638400 | 0.00203100  |
| O  | -0.86583100 | -0.00077300 | -1.10288200 |
| O  | -0.86583100 | 0.00117000  | 1.10262900  |
| C  | -1.49711700 | 0.00025700  | -0.00013400 |
| C  | -2.98716200 | 0.00014000  | -0.00010700 |
| C  | -3.68775400 | -0.00109300 | -1.20992000 |
| C  | -3.68769400 | 0.00128600  | 1.20974200  |
| C  | -5.07907500 | -0.00121900 | -1.21771700 |
| H  | -3.12675400 | -0.00199000 | -2.13590600 |
| C  | -5.07901300 | 0.00123500  | 1.21760800  |
| H  | -3.12664500 | 0.00226600  | 2.13569800  |
| C  | -5.74292200 | -0.00002900 | -0.00003700 |
| H  | -5.64573100 | -0.00218800 | -2.14059000 |
| H  | -5.64562300 | 0.00213100  | 2.14051100  |
| F  | -7.10317700 | -0.00013200 | -0.00000200 |

Sum of electronic and zero-point Energies = -2768.680249

**ThCl<sub>4</sub>(*p*-C<sub>6</sub>H<sub>4</sub>FCO<sub>2</sub>)<sup>-</sup> *p*-IM1**

|    |             |             |             |
|----|-------------|-------------|-------------|
| Th | -1.43220600 | 0.05639100  | -0.00506200 |
| Cl | -1.25343700 | 0.26161000  | 2.65520900  |
| Cl | -1.71403100 | 2.66824500  | -0.35802500 |
| Cl | -3.72799600 | -1.26756700 | 0.20355100  |
| Cl | -1.31103700 | -0.46114700 | -2.62500800 |
| O  | 1.65912500  | -2.55193000 | 0.25235500  |
| O  | 0.71392200  | -0.53291600 | 0.05469500  |
| C  | 1.75086500  | -1.34442500 | 0.13285800  |
| C  | 3.09126700  | -0.66169300 | 0.06432200  |
| C  | 3.21180700  | 0.72620100  | -0.05319600 |
| C  | 4.24797700  | -1.44652400 | 0.12296000  |
| C  | 4.46687000  | 1.32798800  | -0.11077100 |
| H  | 2.31810100  | 1.33393400  | -0.09844100 |
| C  | 5.50889300  | -0.86211800 | 0.06576400  |
| C  | 5.58885600  | 0.51777400  | -0.04989100 |
| H  | 4.57942600  | 2.40136200  | -0.20009800 |

|                                                          |            |             |             |
|----------------------------------------------------------|------------|-------------|-------------|
| H                                                        | 6.41570500 | -1.45287300 | 0.10936200  |
| H                                                        | 4.13703800 | -2.51991000 | 0.21372100  |
| F                                                        | 6.81946700 | 1.09760200  | -0.10499600 |
| Sum of electronic and zero-point Energies = -2768.667934 |            |             |             |

***p*-TS1** (-228 cm<sup>-1</sup>)

|    |             |             |             |
|----|-------------|-------------|-------------|
| Th | 0.93226200  | -0.16169900 | -0.00068000 |
| Cl | 0.82011500  | 0.16010300  | 2.66077400  |
| Cl | 0.83574100  | -2.80685100 | -0.01129100 |
| Cl | 3.52587200  | 0.43582700  | 0.00184200  |
| Cl | 0.82036700  | 0.18354300  | -2.65921900 |
| O  | -1.71698300 | 3.21284200  | 0.01204700  |
| O  | 0.44367400  | 2.39452600  | 0.01020700  |
| C  | -0.73874100 | 2.57669400  | 0.01017700  |
| C  | -1.66097600 | 0.40107700  | 0.00144300  |
| C  | -2.37212500 | 0.15945900  | 1.19817400  |
| C  | -2.37244000 | 0.16929300  | -1.19704000 |
| C  | -3.68932700 | -0.30176000 | 1.21138400  |
| H  | -1.88706500 | 0.32659900  | 2.15378300  |
| C  | -3.68963200 | -0.29183900 | -1.21363900 |
| C  | -4.31965300 | -0.51799100 | -0.00194800 |
| H  | -4.21989000 | -0.49124400 | 2.13761100  |
| H  | -4.22043700 | -0.47383100 | -2.14123200 |
| H  | -1.88768700 | 0.34435100  | -2.15139000 |
| F  | -5.60891900 | -0.96845400 | -0.00363500 |

Sum of electronic and zero-point Energies = -2768.599599

**ThCl<sub>4</sub>(*p*-C<sub>6</sub>H<sub>4</sub>F)<sup>-</sup>** ***p*-IM2**

|    |             |             |             |
|----|-------------|-------------|-------------|
| Th | 0.00000000  | 0.00000000  | 0.87577800  |
| Cl | 0.00000000  | 2.67273900  | 0.77033800  |
| Cl | -2.40243400 | -0.00003000 | 2.03742200  |
| Cl | 2.40243400  | 0.00003000  | 2.03742200  |
| Cl | 0.00000000  | -2.67273900 | 0.77033800  |
| C  | 0.00000000  | 0.00000000  | -1.61839900 |
| C  | 1.19411000  | 0.00065500  | -2.36291200 |
| C  | -1.19411000 | -0.00065500 | -2.36291200 |
| C  | 1.21272400  | 0.00066000  | -3.76030100 |
| H  | 2.15635700  | 0.00119900  | -1.85332600 |
| C  | -1.21272400 | -0.00066000 | -3.76030100 |
| H  | -2.15635700 | -0.00119900 | -1.85332600 |
| C  | 0.00000000  | 0.00000000  | -4.42780100 |
| H  | 2.13908100  | 0.00117100  | -4.32376600 |
| H  | -2.13908100 | -0.00117100 | -4.32376600 |
| F  | 0.00000000  | 0.00000000  | -5.79710100 |

Sum of electronic and zero-point Energies = -2579.969570

***p*-TS2** (-190 cm<sup>-1</sup>)

|    |            |            |             |
|----|------------|------------|-------------|
| Th | 0.94820000 | 0.00170000 | -0.00330000 |
|----|------------|------------|-------------|

|    |             |             |             |
|----|-------------|-------------|-------------|
| Cl | 2.68010000  | 0.06720000  | -1.98380000 |
| Cl | 0.75700000  | 2.64850000  | 0.11060000  |
| Cl | 0.57990000  | -2.61990000 | -0.23020000 |
| Cl | 2.11780000  | -0.19170000 | 2.34300000  |
| C  | -5.11350000 | -1.16250000 | 0.12070000  |
| C  | -3.66840000 | -1.18000000 | 0.02750000  |
| C  | -5.89530000 | -0.01720000 | 0.05820000  |
| C  | -3.14310000 | 0.04650000  | -0.12680000 |
| H  | -3.11470000 | -2.10540000 | 0.07930000  |
| C  | -5.18270000 | 1.16280000  | -0.10490000 |
| C  | -3.74060000 | 1.24680000  | -0.20610000 |
| H  | -5.67070000 | 2.13450000  | -0.16800000 |
| H  | -3.24240000 | 2.19680000  | -0.32700000 |
| F  | -1.28890000 | 0.09190000  | -0.24590000 |
| H  | -5.54320000 | -2.15530000 | 0.24710000  |

Sum of electronic and zero-point Energies = -2579.862958
